# Supplementary material for: Oral steroids for reducing kidney scarring in young children with febrile urinary tract infections: the contribution of Bayesian analysis to a randomized trial not reaching its intended sample size
Source: Springer Nature journal article supplement (doi:10.1007/s00467-021-05117-5), 2021-05-25
Supplement: MOESM2 [file 19194998]

## Supplementary Tables- Online Resource 2

### Title:

Oral steroids for reducing renal scarring in young children with febrile urinary tract infections: the contribution of Bayesian analysis to a randomized trial not reaching its intended sample size

### Authors:

Liviana Da Dalt<sup>a\*</sup>, Silvia Bressan<sup>a\*</sup>, Floriana Scozzola<sup>b</sup>, Enrico Vidal<sup>a,c</sup>, Monia Gennari<sup>d</sup>, Claudio La Scola<sup>e</sup>, Mauro Anselmi<sup>f</sup>, Elisabetta Miorin<sup>c</sup>, Pietro Zucchetta<sup>g</sup>, Danila Azzolina<sup>h</sup>, Dario Gregori<sup>h</sup>, Giovanni Montini<sup>i,l</sup>

\* Joint first authors

### Affiliations:

<sup>a</sup>Department of Women's and Children's Health, University of Padova, Padova, Italy;

<sup>b</sup>Pediatric Unit, Treviso Hospital, Treviso, Italy;

<sup>c</sup>Division of Pediatrics, Department of Medicine (DAME), University Hospital of Udine, Italy;

<sup>d</sup>Pediatric Emergency Unit, Department of Medical and Surgical Sciences (DIMEC), S. Orsola Hospital, Bologna, Italy;

<sup>e</sup>Nephrology and Dialysis Unit, Department of Woman, Child and Urological Diseases, Azienda Ospedaliero-Universitaria Sant'Orsola-Malpighi, Bologna, Italy

<sup>f</sup>Pediatric Unit, Dolo-Mirano Hospital, Dolo, Italy;

<sup>g</sup>Nuclear Medicine Unit, Department of Medicine DIMED, University-Hospital of Padova, Padova, Italy

<sup>h</sup>Unit of Biostatistics, Epidemiology and Public Health, Department of Cardiac, Thoracic, Vascular Sciences and Public Health, University of Padova, Padova, Italy;

<sup>i</sup>Pediatric Nephrology, Dialysis and Transplant Unit, Fondazione IRCCS Ca' Granda, Ospedale Maggiore Policlinico, Milano, Italy;

<sup>l</sup>Giuliana and Bernardo Caprotti Chair of Pediatrics, Department of Clinical Sciences and Community Health, University of Milano, Milano, Italy.

### Corresponding author:

Silvia Bressan

Department of Women's and Children's Health, University of Padova

Via Giustiniani 4, 35128, Padova (Italy)

[silvia.bressan.1@unipd.it](mailto:silvia.bressan.1@unipd.it); [silviabress@gmail.com](mailto:silviabress@gmail.com)

Tel: +39 0498213570.

**eTable 1.** Comparison of baseline demographic characteristics between enrolled patients and eligible plus potentially eligible patients.

|                                      | <b>n = 48</b>  | <b>n = 164*</b> | <b>p</b> |
|--------------------------------------|----------------|-----------------|----------|
| <b>Age in months - median, (IQR)</b> | 8.3 (4.2-12.9) | 9.1 (6.1-13.4)  | 0.259    |
| <b>Sex (females) – n (%)</b>         | 29 (60%)       | 108 (70%)       | 0.231    |
| <b>Race (caucasian) – n (%)</b>      | 40 (83%)       | 130 (84%)       | 0.924    |

\* sum of potentially eligible children (n=131, who did not undergo PCT determination or urine catheterization for urine specimen collection) and eligible children (declined consent, n=21; and not approached, n=12)

**eTable 2.** Baseline demographic and clinical characteristics of patients who completed the follow up for the assessment of the primary outcome and those who were lost to follow up

| Variables                                   | Total randomized patients (n= 48)<br>Patients excluded after randomization (n=8§) |                            | p     |
|---------------------------------------------|-----------------------------------------------------------------------------------|----------------------------|-------|
|                                             | Included in the final analysis<br>n= 18                                           | Lost to follow up<br>n= 22 |       |
| Age in months                               | 7.2 (3.9-15.9)                                                                    | 9.1 (5.3-12.6)             | 0.891 |
| Sex (females)                               | 10 (56%)                                                                          | 14 (64%)                   | 0.604 |
| Race (caucasian)                            | 15 (83%)                                                                          | 20 (91%)                   | 0.515 |
| Urinary tract abnormalities on fetal US     | 0 (0%)                                                                            | 0 (0%)                     | na    |
| Max body temperature in °C                  | 39.4 (39.0-40.0)                                                                  | 39.7 (39.3-40.0)           | 0.179 |
| Duration of fever in days                   | 2.5 (2-4)                                                                         | 2.5 (2-4)                  | 0.944 |
| Weight in kg                                | 8.3 (6.6-10.9)                                                                    | 9.0 (7.0-10.0)             | 0.935 |
| Weight percentile by sex/age                | 50.0 (25.0-90.0)                                                                  | 75.0 (50.0-95.0)           | 0.176 |
| Height in cm                                | 69.0 (62.0-80.0)                                                                  | 70.5 (65.0-76.0)           | 0.860 |
| Height percentile by sex/age                | 75.0 (50.0 -90.0)                                                                 | 75.0 (50.0 -90.0)          | 0.338 |
| PCT ng/ml                                   | 2.6 (1.7-6.1)                                                                     | 2.8 (1.3 – 8.1)            | 0.891 |
| CRP mg/L                                    | 16.75 (10.0-109)                                                                  | 10.2 (6.9-70.0)            | 0.464 |
| Leukocytes n/mm <sup>3</sup>                | 18.100 (8.680-23.650)                                                             | 16.740(12.510-23.000)      | 0.927 |
| Hemoglobin g/L                              | 11.1 (10.1-11.6)                                                                  | 11.2 (10.7-11.7)           | 0.532 |
| Urea mg/dL                                  | 13.0 (9.1-16.5)                                                                   | 10.6 (7.0-16.0)            | 0.519 |
| Creatinine mg/dL                            | 0.32 (0.28-0.39)                                                                  | 0.31 (0.26-0.36)           | 0.470 |
| Leukocyturia on urine dipstick              | 18 (100%)                                                                         | 22 (100%)                  | na    |
| Nitratia on urine dipstick                  | 15 (83%)                                                                          | 15 (68%)                   | 0.271 |
| Hospitalization                             | 13 (72%)                                                                          | 15 (68%)                   | 0.701 |
| Antibiotics initially administered          |                                                                                   |                            | 0.781 |
| • Oral                                      |                                                                                   |                            |       |
| ○ Amoxicillin –clavulanate                  | 7 (39%)                                                                           | 10 (46%)                   |       |
| • Parenteral                                |                                                                                   |                            |       |
| ○ Ceftriaxone                               | 10 (56%)                                                                          | 10 (46%)                   |       |
| ○ Amoxicillin –clavulanate                  | 0 (0%)                                                                            | 1 (5%)                     |       |
| ○ Ampicillin - sulbactam                    | 1 (6%)                                                                            | 1 (5%)                     |       |
| Antibiotic therapy duration in days         | 10 (10-10)                                                                        | 10 (9-10)                  | 0.085 |
| Renal and bladder US performed              | 16 (89%)                                                                          | 20 (91%)                   | 1.000 |
| Patients with abnormal findings             | 7 (44%)                                                                           | 5 (25%)                    |       |
| ○ Loss of cortico-medullary differentiation | 0                                                                                 | 1                          |       |
| ○ Parenchymal thinning                      | 1                                                                                 | 0                          |       |
| ○ Parenchymal hyperechogenicity             | 0                                                                                 | 1                          |       |
| ○ Calyceal dilatation                       | 4                                                                                 | 3                          |       |
| ○ Pelvic dilatation                         | 3                                                                                 | 3                          |       |
| ○ Urethral dilatation                       | 2                                                                                 | 1                          |       |

§ 6 patients eventually had a negative urine culture, one patient withdrew consent after randomization and one had recurrent UTIs.
